# Supplementary material
Source: PubMed Central journal article supplement (PMC3490627)
Supplement: NIHMS412763-supplement-ESI.pdf [file NIHMS412763-supplement-ESI.pdf]

## Supporting Information

**Figure S1:** Comparison of the electrostatic potential energy (V) and Fe-Fe separation ( $d_{\text{FeFe}}$ ) for the hits from the Brownian Dynamics simulations for docking cyt  $b_5$  with Mb(wt) and Mb(3M). Colored circles identify the starting geometries. Border plots show the total number of hits in a slices with  $V = 0.1$  kcal/mol and  $d_{\text{FeFe}} = 0.1$  Å.

**Figure S2:** A semi-log plot of average electronic coupling constants as a function of  $d_{\text{FeFe}}$ , colored according to whether or not a solvent molecule is found in the pathway (red) or not (blue). For reference, the fit line for the couplings is given (from Figure 4) with  $\beta = 1.3\text{Å}^{-1}$  (black line), as well as the best fit obtained from the starting geometries of the MD, without water (gray line,  $\beta_0 = 1.45\text{Å}^{-1}$ ).

**Table S1:** Ranges in  $d_{\text{FeFe}}$  for Mb(wt) and Mb(3M) ensembles.

**Table S2:**  $d_{\text{FeFe}}$ , pathways calculated  $T_{\text{DA}}^2$  average from 51 snapshots, the standard deviations from 51 snapshots, and pathways calculated from the production run initial structure (without water molecules).

**Table S3:** Analysis of water molecules that are within  $3.5\text{Å}$  of the propionic acids' oxygen for the COM BD initial geometries. Shown is the average number of water molecules (for 50 snapshots), as well as their location.

**Figure S1:** Comparison of the electrostatic potential energy ( $V$ ) and Fe-Fe separation ( $d_{\text{FeFe}}$ ) for the hits from the Brownian Dynamics simulations for docking *cyt b<sub>5</sub>* with Mb(wt) and Mb(3M). Colored circles identify the starting geometries. Border plots show the total number of hits in a slices with  $V = 0.1$  kcal/mol and  $d_{\text{FeFe}} = 0.1$  Å.

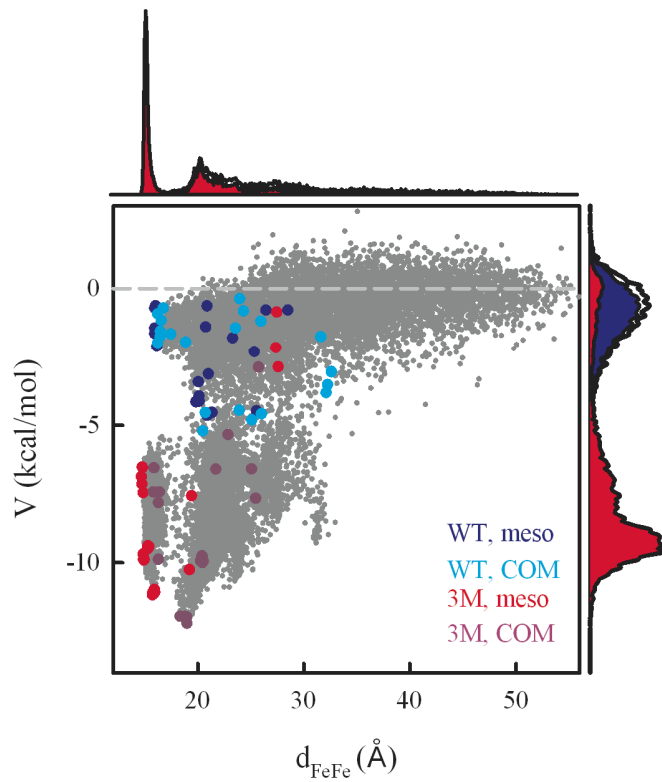

**Figure S2:** A semi-log plot of average electronic coupling constants as a function of  $d_{\text{FeFe}}$ , colored according to whether or not a solvent molecule is found in the pathway (red) or not (blue). For reference, the fit line for the couplings is given (from Figure 4) with  $\beta = 1.3 \text{ \AA}^{-1}$  (black line), as well as the best fit obtained from the starting geometries of the MD, without water (gray line,  $\beta_0 = 1.45 \text{ \AA}^{-1}$ ).

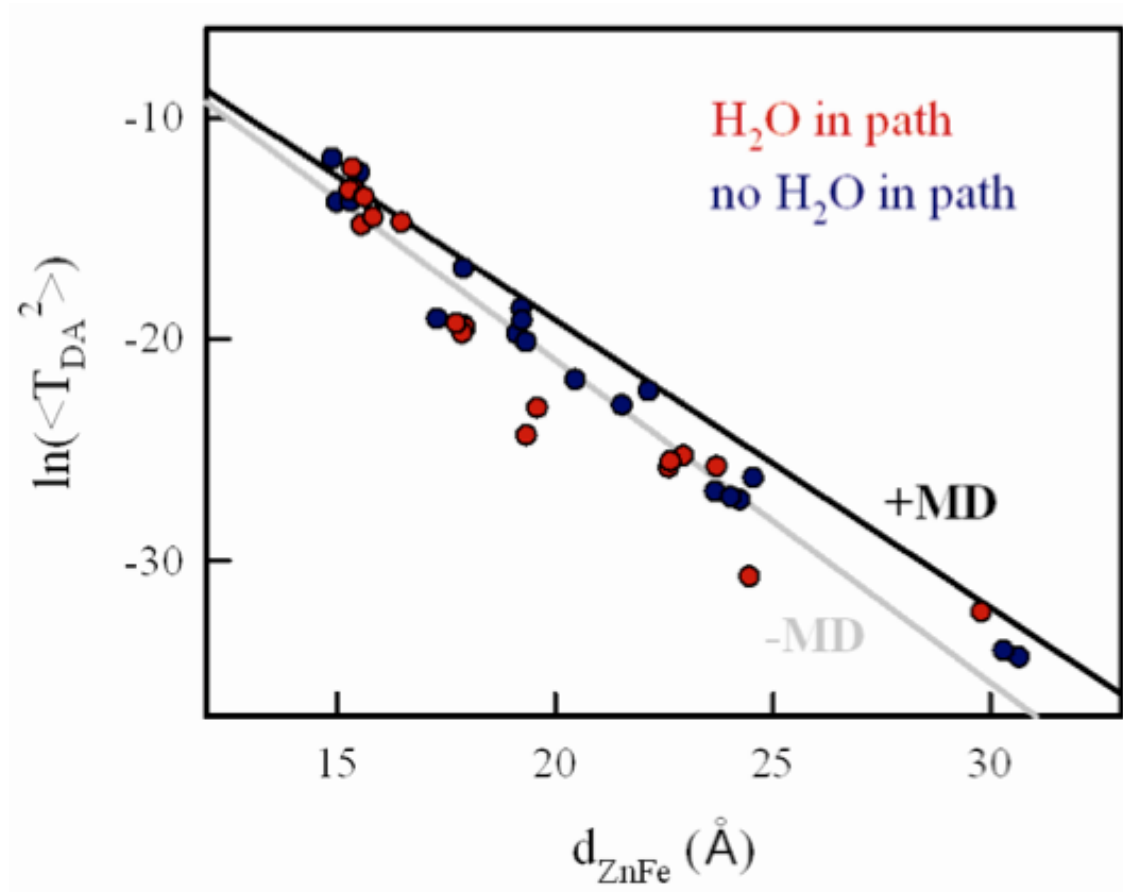

**Table S1:** Ranges in  $d_{\text{FeFe}}$  for Mb(wt) and Mb(3M) BD ensembles.

|        |        | $d_{\text{FeFe}}$ (Å) |         |
|--------|--------|-----------------------|---------|
|        |        | Minimum               | Maximum |
| Mb(wt) | Meso-C | 15.9                  | 31.6    |
|        | COM    | 16.2                  | 56.9    |
| Mb(3M) | Meso-C | 14.6                  | 30.7    |
|        | COM    | 15.8                  | 55.0    |

**Table S2:**  $d_{\text{FeFe}}$ , pathways calculated  $T_{\text{DA}}^2$  average from 51 snapshots, the standard deviations from 51 snapshots, and pathways calculated from the production run initial structure (without water molecules).

|        | $d_{\text{FeFe}}$<br>(Å) | $\langle T_{\text{DA}}^2 \rangle$<br>(eV <sup>2</sup> ) | std. dev.<br>$\langle T_{\text{DA}}^2 \rangle$ | ${}^0T_{\text{da}}^2$  |
|--------|--------------------------|---------------------------------------------------------|------------------------------------------------|------------------------|
| Mb(3M) | 14.88                    | $1.17 \times 10^{-5}$                                   | $1.27 \times 10^{-6}$                          | $7.15 \times 10^{-6}$  |
|        | 14.98                    | $3.39 \times 10^{-6}$                                   | $4.80 \times 10^{-7}$                          | $1.01 \times 10^{-6}$  |
|        | 15.34                    | $8.22 \times 10^{-6}$                                   | $1.04 \times 10^{-6}$                          | $4.72 \times 10^{-6}$  |
|        | 15.36                    | $3.72 \times 10^{-6}$                                   | $4.46 \times 10^{-7}$                          | $1.85 \times 10^{-6}$  |
|        | 15.43                    | $3.58 \times 10^{-6}$                                   | $4.77 \times 10^{-7}$                          | $1.61 \times 10^{-6}$  |
|        | 17.28                    | $2.32 \times 10^{-8}$                                   | $3.47 \times 10^{-9}$                          | $5.19 \times 10^{-9}$  |
|        | 17.72                    | $1.13 \times 10^{-7}$                                   | $3.89 \times 10^{-8}$                          | $4.16 \times 10^{-9}$  |
|        | 17.87                    | $2.30 \times 10^{-8}$                                   | $4.65 \times 10^{-9}$                          | $2.71 \times 10^{-9}$  |
|        | 17.90                    | $1.76 \times 10^{-8}$                                   | $4.22 \times 10^{-9}$                          | $3.81 \times 10^{-9}$  |
|        | 17.93                    | $5.12 \times 10^{-8}$                                   | $1.76 \times 10^{-8}$                          | $3.41 \times 10^{-9}$  |
|        | 19.11                    | $1.09 \times 10^{-8}$                                   | $3.30 \times 10^{-9}$                          | $2.62 \times 10^{-9}$  |
|        | 19.22                    | $2.74 \times 10^{-8}$                                   | $9.71 \times 10^{-9}$                          | $8.30 \times 10^{-9}$  |
|        | 19.24                    | $1.71 \times 10^{-8}$                                   | $2.83 \times 10^{-9}$                          | $4.77 \times 10^{-9}$  |
|        | 19.33                    | $7.19 \times 10^{-9}$                                   | $2.10 \times 10^{-9}$                          | $1.82 \times 10^{-9}$  |
|        | 20.46                    | $3.69 \times 10^{-9}$                                   | $4.44 \times 10^{-10}$                         | $3.32 \times 10^{-10}$ |
|        | 21.52                    | $4.15 \times 10^{-10}$                                  | $7.99 \times 10^{-11}$                         | $1.06 \times 10^{-10}$ |
|        | 23.67                    | $1.95 \times 10^{-11}$                                  | $4.22 \times 10^{-12}$                         | $2.12 \times 10^{-12}$ |
| 24.03  | $9.61 \times 10^{-12}$   | $4.07 \times 10^{-12}$                                  | $1.67 \times 10^{-12}$                         |                        |
| 24.24  | $4.08 \times 10^{-12}$   | $7.86 \times 10^{-13}$                                  | $1.47 \times 10^{-12}$                         |                        |
| Mb(wt) | 15.28                    | $4.65 \times 10^{-6}$                                   | $8.94 \times 10^{-7}$                          | $1.72 \times 10^{-6}$  |
|        | 15.29                    | $1.98 \times 10^{-6}$                                   | $1.74 \times 10^{-7}$                          | $1.05 \times 10^{-6}$  |
|        | 15.51                    | $6.45 \times 10^{-6}$                                   | $4.86 \times 10^{-7}$                          | $3.79 \times 10^{-6}$  |
|        | 15.55                    | $9.12 \times 10^{-7}$                                   | $1.50 \times 10^{-7}$                          | $3.60 \times 10^{-7}$  |
|        | 15.60                    | $2.27 \times 10^{-6}$                                   | $1.69 \times 10^{-7}$                          | $1.26 \times 10^{-6}$  |
|        | 15.62                    | $2.49 \times 10^{-6}$                                   | $4.42 \times 10^{-7}$                          | $1.25 \times 10^{-6}$  |
|        | 15.81                    | $1.33 \times 10^{-6}$                                   | $1.75 \times 10^{-7}$                          | $5.10 \times 10^{-7}$  |
|        | 16.47                    | $1.29 \times 10^{-6}$                                   | $1.64 \times 10^{-7}$                          | $4.05 \times 10^{-7}$  |
|        | 17.89                    | $2.53 \times 10^{-7}$                                   | $2.07 \times 10^{-8}$                          | $5.10 \times 10^{-8}$  |
|        | 19.34                    | $1.09 \times 10^{-9}$                                   | $2.98 \times 10^{-10}$                         | $2.71 \times 10^{-11}$ |
|        | 19.58                    | $4.54 \times 10^{-9}$                                   | $8.00 \times 10^{-10}$                         | $9.31 \times 10^{-11}$ |
|        | 22.13                    | $1.32 \times 10^{-9}$                                   | $6.44 \times 10^{-10}$                         | $2.00 \times 10^{-10}$ |
|        | 22.60                    | $5.83 \times 10^{-11}$                                  | $5.71 \times 10^{-11}$                         | $6.31 \times 10^{-12}$ |
|        | 22.63                    | $4.98 \times 10^{-11}$                                  | $8.94 \times 10^{-12}$                         | $8.32 \times 10^{-12}$ |
|        | 22.94                    | $6.67 \times 10^{-11}$                                  | $1.43 \times 10^{-11}$                         | $1.08 \times 10^{-11}$ |
|        | 23.70                    | $3.34 \times 10^{-11}$                                  | $4.65 \times 10^{-12}$                         | $6.64 \times 10^{-12}$ |
|        | 24.45                    | $4.79 \times 10^{-12}$                                  | $6.69 \times 10^{-13}$                         | $4.63 \times 10^{-14}$ |
| 24.55  | $2.97 \times 10^{-11}$   | $8.47 \times 10^{-12}$                                  | $3.93 \times 10^{-12}$                         |                        |
| 29.78  | $2.18 \times 10^{-13}$   | $6.64 \times 10^{-14}$                                  | $9.41 \times 10^{-15}$                         |                        |

|  |       |                        |                        |                        |
|--|-------|------------------------|------------------------|------------------------|
|  | 30.30 | $9.94 \times 10^{-15}$ | $2.43 \times 10^{-15}$ | $1.65 \times 10^{-15}$ |
|  | 30.56 | $2.06 \times 10^{-15}$ | $4.51 \times 10^{-16}$ | $4.28 \times 10^{-17}$ |
|  | 30.66 | $4.74 \times 10^{-15}$ | $9.23 \times 10^{-16}$ | $1.22 \times 10^{-15}$ |
|  | 30.65 | $5.18 \times 10^{-14}$ | $2.24 \times 10^{-14}$ | $5.07 \times 10^{-17}$ |

**Table S3:** Analysis of water molecules that are within 3.5Å of the propionic acids' oxygen for the COM BD initial geometries. Shown is the average number of water molecules (for 50 snapshots), as well as their location.

| Protein | $d_{\text{FeFe}}$<br>(Å) | Number of Water Molecules |         |                |
|---------|--------------------------|---------------------------|---------|----------------|
|         |                          | Total                     | Mb side | Cyt $b_5$ side |
| Mb(3M)  | 14.9                     | 24.0                      | 18.0    | 12.0           |
|         | 15.0                     | 27.1                      | 6.0     | 21.1           |
|         | 15.3                     | 41.1                      | 20.1    | 27.6           |
|         | 15.4                     | 39.0                      | 21.0    | 18.0           |
|         | 15.4                     | 39.0                      | 21.0    | 18.0           |
|         | 17.3                     | 41.1                      | 16.1    | 24.9           |
|         | 17.7                     | 46.5                      | 18.0    | 28.5           |
|         | 17.9                     | 48.5                      | 24.5    | 24.0           |
|         | 17.9                     | 45.1                      | 21.1    | 24.1           |
|         | 17.9                     | 49.1                      | 18.0    | 31.1           |
|         | 19.1                     | 47.4                      | 14.6    | 32.8           |
|         | 19.2                     | 46.6                      | 16.2    | 30.4           |
|         | 19.2                     | 47.3                      | 22.4    | 24.9           |
|         | 19.3                     | 47.6                      | 20.9    | 26.8           |
|         | 20.5                     | 57.9                      | 21.8    | 36.1           |
|         | 21.5                     | 50.8                      | 21.2    | 29.6           |
|         | 23.7                     | 31.7                      | 3.2     | 28.5           |
|         | 24.0                     | 44.9                      | 12.0    | 32.9           |
|         | 24.2                     | 36.9                      | 9.2     | 27.7           |
|         | Mb(wt)                   | 15.3                      | 34.9    | 16.9           |
| 15.3    |                          | 34.6                      | 18.5    | 19.4           |
| 15.5    |                          | 39.0                      | 15.0    | 24.0           |
| 15.5    |                          | 32.4                      | 21.0    | 11.4           |
| 15.6    |                          | 35.8                      | 17.6    | 27.2           |
| 15.6    |                          | 33.6                      | 15.0    | 25.7           |
| 15.8    |                          | 44.1                      | 23.1    | 27.0           |
| 16.5    |                          | 36.0                      | 21.0    | 21.0           |
| 17.9    |                          | 41.9                      | 18.0    | 26.9           |
| 19.3    |                          | 49.1                      | 21.5    | 27.5           |
| 19.6    |                          | 54.8                      | 24.5    | 30.4           |
| 22.1    |                          | 45.9                      | 12.0    | 33.9           |
| 22.6    |                          | 47.4                      | 17.6    | 29.7           |
| 22.6    |                          | 60.4                      | 24.9    | 35.5           |
| 22.9    |                          | 53.1                      | 21.0    | 32.1           |
| 23.7    |                          | 45.0                      | 21.0    | 24.0           |
| 24.5    |                          | 54.0                      | 23.9    | 30.1           |
| 24.5    |                          | 54.0                      | 21.1    | 32.9           |
| 29.8    | 54.4                     | 23.4                      | 31.0    |                |

|  |      |      |      |      |
|--|------|------|------|------|
|  | 30.3 | 47.3 | 21.2 | 26.1 |
|  | 30.6 | 51.6 | 23.1 | 28.6 |
|  | 30.6 | 46.0 | 15.6 | 30.4 |
|  | 30.7 | 49.5 | 18.1 | 31.4 |
